# Supplementary material
Source: Royal Society of Chemistry journal article supplement (doi:10.1039/d5nj04920b)
Supplement: d5nj04920b1.pdf [file d5nj04920b1.pdf]

# Highly Dispersed Zirconium–Oxo Species Anchored on Ultrathin $g\text{-C}_3\text{N}_4$ Nanosheets for Efficient Catalytic Transfer Hydrogenation of Furfural

Yanan Li, Yixiao Shi, Lei Li, Lijun Wang\*

School of Chemistry and Chemical Engineering, Shaoxing University, Shaoxing 312000, China. E-mail:

ljwang@usx.edu.cn

## Figures S1-S9 and Table S1-S2

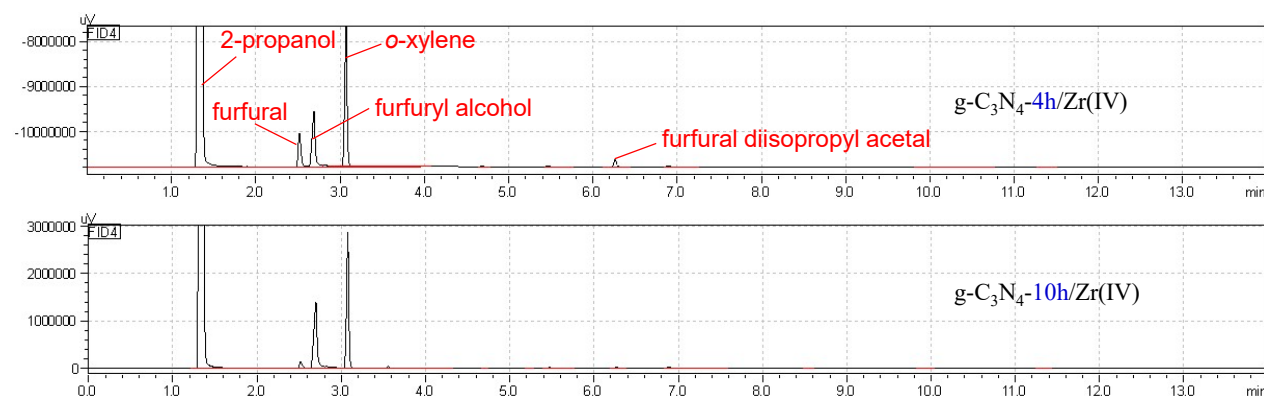

**Figure S1.** GC spectra of the liquid products from the reaction of furfural with 2-propanol over  $g\text{-C}_3\text{N}_4\text{-}x\text{h/Zr(IV)}$  catalysts. Reaction conditions: 50 mg catalyst, 1 mmol furfural, 5 mL 2-propanol, 60  $\mu\text{L}$  o-xylene (internal standard), 1 MPa  $\text{N}_2$ , 120  $^\circ\text{C}$ , 8 h. (Note:  $x$  in  $g\text{-C}_3\text{N}_4\text{-}x\text{h/Zr(IV)}$  denotes the calcination time (in hours) for  $g\text{-C}_3\text{N}_4$  synthesis).

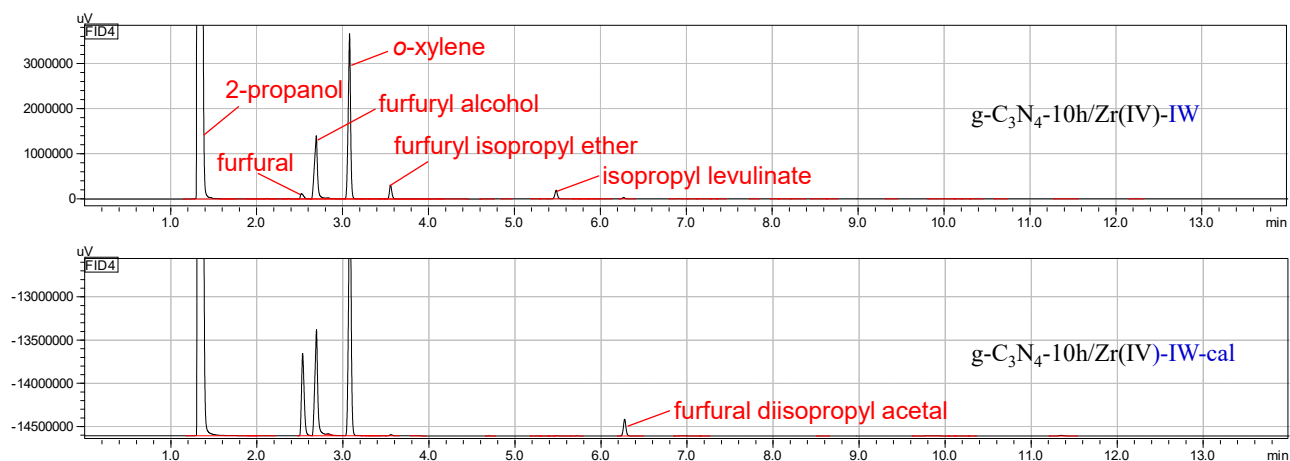

**Figure S2.** GC spectra of the liquid products from the reaction of furfural with 2-propanol over  $g\text{-C}_3\text{N}_4\text{-10h/Zr(IV)-IW}$  prepared by conventional incipient wetness impregnation and its calcined derivative  $g\text{-C}_3\text{N}_4\text{-10h/Zr(IV)-IW-cal}$ . Reaction conditions: 50 mg catalyst, 1 mmol furfural, 5 mL 2-propanol, 60  $\mu\text{L}$  o-xylene (internal standard), 1 MPa  $\text{N}_2$ , 120  $^\circ\text{C}$ , 8 h.

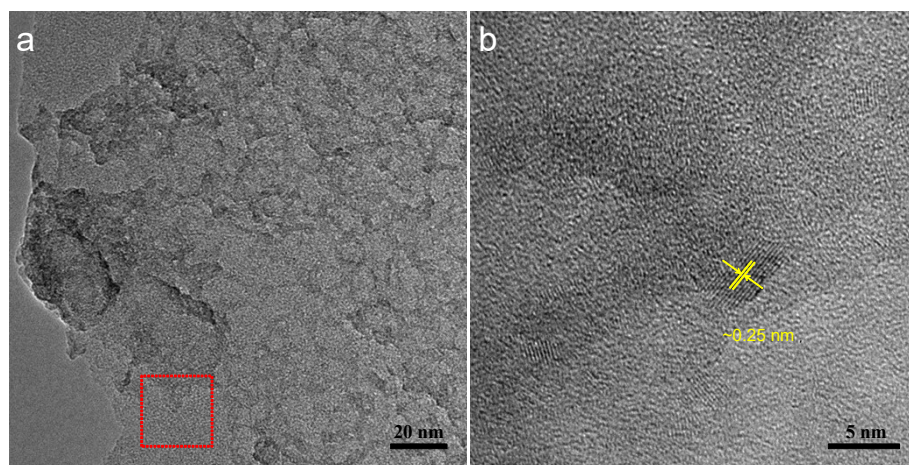

**Figure S3.** (a) TEM image of  $g\text{-C}_3\text{N}_4\text{-4h/Zr(IV)}$ . (b) HRTEM image of the region marked by the dashed red box in (a).

**Table S1.** The contents of Brønsted and Lewis acidic sites of the catalysts obtained from pyridine-IR analysis with pyridine desorption at 150 °C, 250 °C, 350 °C, respectively.<sup>a</sup>

| Samples                                     | T (°C) | Brønsted acid<br>( $\mu\text{mol}\cdot\text{g}^{-1}$ ) | Lewis acid<br>( $\mu\text{mol}\cdot\text{g}^{-1}$ ) | Total acid<br>( $\mu\text{mol}\cdot\text{g}^{-1}$ ) | Brønsted/Lewis<br>acid molar ratios |
|---------------------------------------------|--------|--------------------------------------------------------|-----------------------------------------------------|-----------------------------------------------------|-------------------------------------|
| g-C <sub>3</sub> N <sub>4</sub> -4h/Zr(IV)  | 150    | 14.5                                                   | 111.3                                               | 125.8                                               | 0.13                                |
|                                             | 250    | 12.3                                                   | 80.8                                                | 93.1                                                | 0.15                                |
|                                             | 350    | 6.3                                                    | 40.8                                                | 47.1                                                | 0.15                                |
| g-C <sub>3</sub> N <sub>4</sub> -10h/Zr(IV) | 150    | 18.0                                                   | 157.5                                               | 175.5                                               | 0.11                                |
|                                             | 250    | 12.2                                                   | 83.6                                                | 95.8                                                | 0.15                                |
|                                             | 350    | 5.8                                                    | 39.7                                                | 45.5                                                | 0.15                                |

<sup>a</sup> The acidic site amounts at the desorption temperatures of 150 °C, 250 °C, and 350 °C, respectively, represent all strength of the specific acidic sites, moderately and strongly acidic sites, and strongly acidic sites, respectively (*Inorg. Chem.* 2024, **63**, 13775-13784).

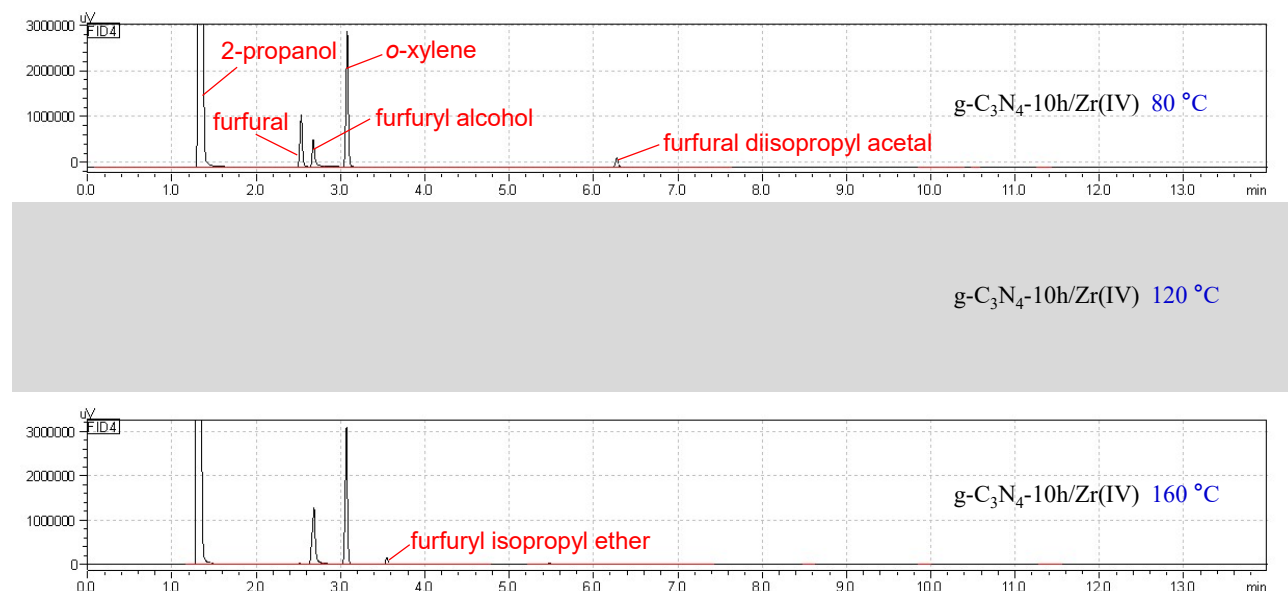

**Figure S4.** GC spectra of the liquid products from the reaction of furfural with 2-propanol over g-C<sub>3</sub>N<sub>4</sub>-10h/Zr(IV) at different temperatures. Reaction conditions: 50 mg g-C<sub>3</sub>N<sub>4</sub>-10h/Zr(IV), 1 mmol furfural, 5 mL 2-propanol, 60  $\mu\text{L}$  o-xylene (internal standard), 1 MPa N<sub>2</sub>, 8 h.

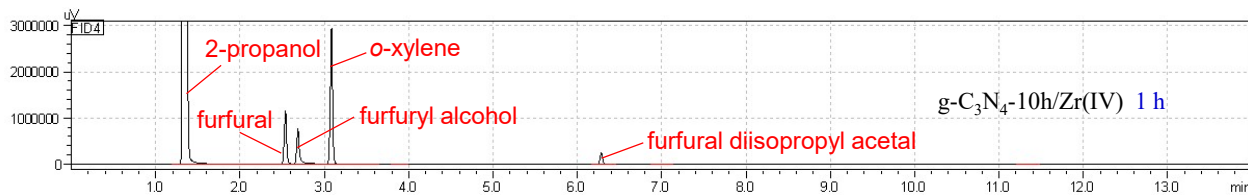

g-C<sub>3</sub>N<sub>4</sub>-10h/Zr(IV) 10 h

**Figure S5.** GC spectra of the liquid products from the reaction of furfural with 2-propanol over g-C<sub>3</sub>N<sub>4</sub>-10h/Zr(IV) at different reaction times. Reaction conditions: 50 mg g-C<sub>3</sub>N<sub>4</sub>-10h/Zr(IV), 1 mmol furfural, 5 mL 2-propanol, 60  $\mu$ L o-xylene (internal standard), 1 MPa N<sub>2</sub>, 120  $^{\circ}$ C.

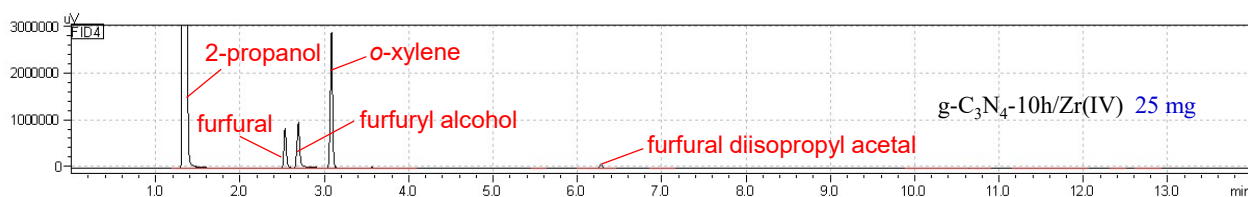

g-C<sub>3</sub>N<sub>4</sub>-10h/Zr(IV) 50 mg

**Figure S6.** GC spectra of the liquid products from the reaction of furfural with 2-propanol over varying amounts of g-C<sub>3</sub>N<sub>4</sub>-10h/Zr(IV). Reaction conditions: 1 mmol furfural, 5 mL 2-propanol, 60  $\mu$ L o-xylene (internal standard), 1 MPa N<sub>2</sub>, 120  $^{\circ}$ C, 8 h.

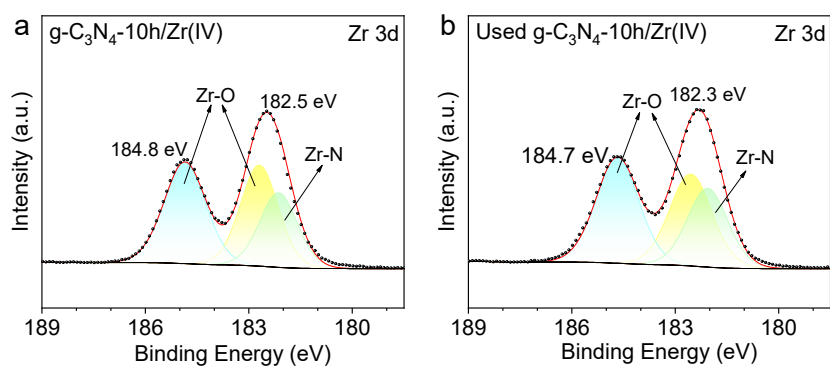

**Figure S7.** Zr 3d XPS spectra of (a) fresh g-C<sub>3</sub>N<sub>4</sub>-10h/Zr(IV) and (b) Used g-C<sub>3</sub>N<sub>4</sub>-10h/Zr(IV) after recycling.

**Table S2.** Surface elemental composition determined by XPS analysis.

| Sample                                            | C (Atomic %) | N (Atomic %) | C/N atomic ratio | Zr (Atomic %) |
|---------------------------------------------------|--------------|--------------|------------------|---------------|
| Fresh g-C <sub>3</sub> N <sub>4</sub> -10h/Zr(IV) | 52.6         | 44.0         | 1.195            | 3.4           |
| Used g-C <sub>3</sub> N <sub>4</sub> -10h/Zr(IV)  | 48.2         | 48.3         | 0.998            | 3.5           |

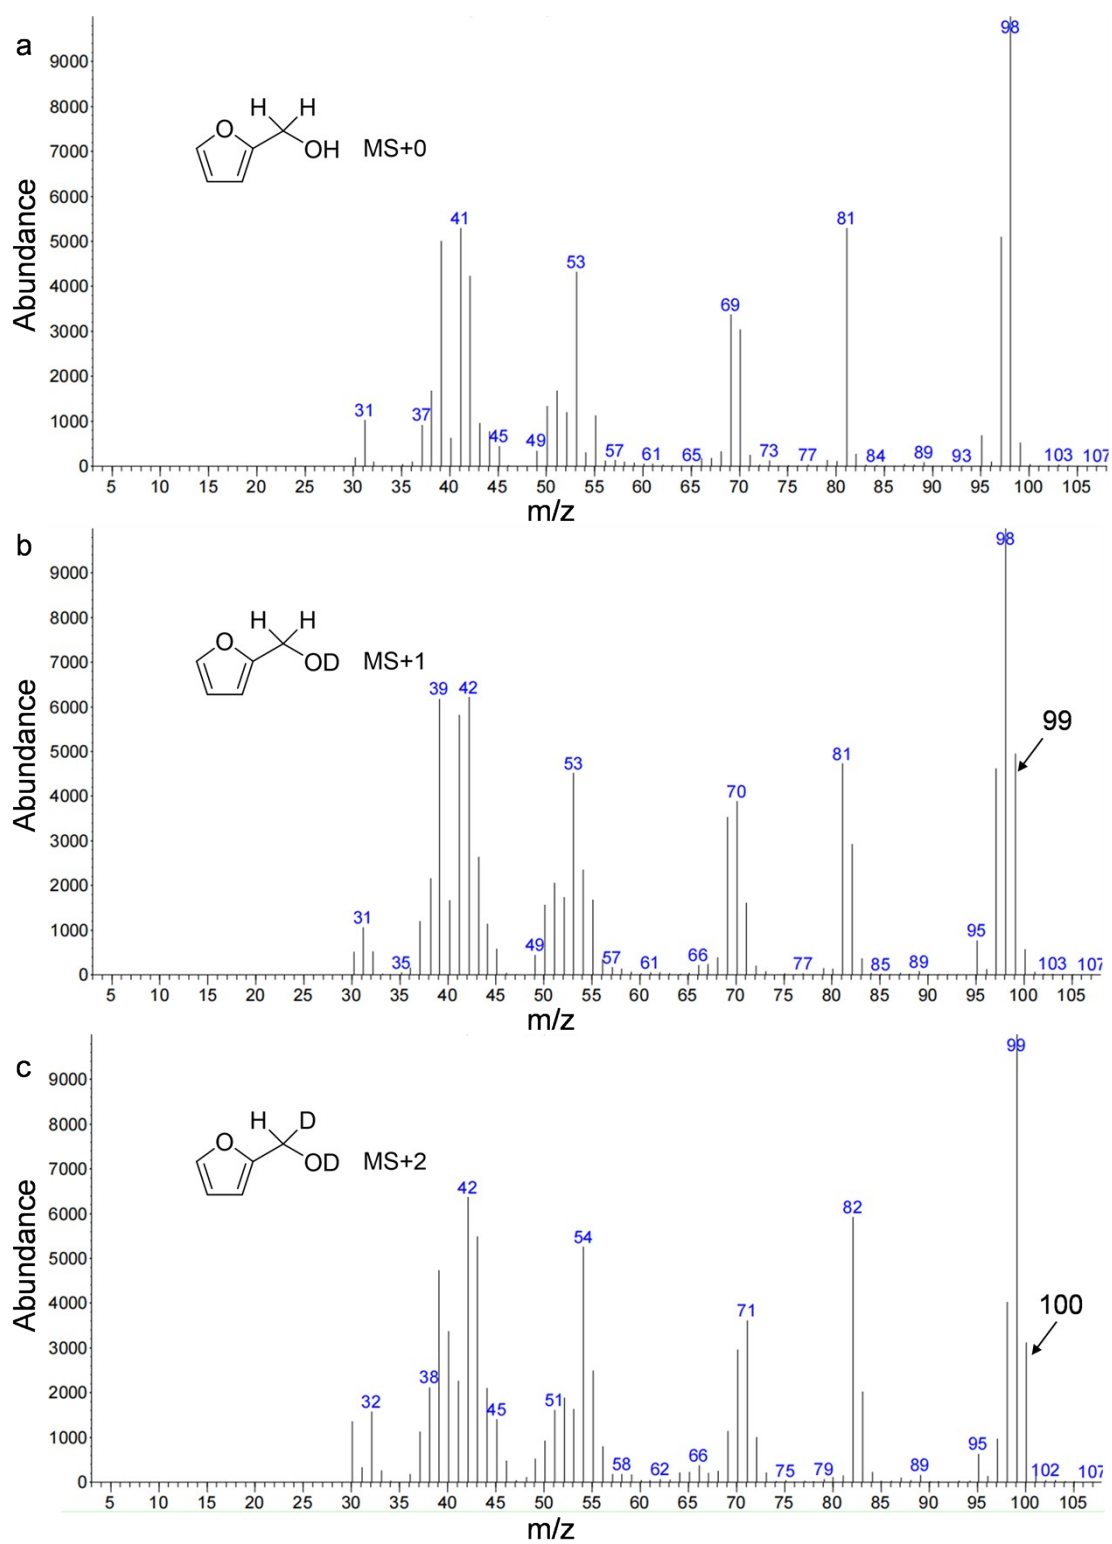

**Figure S8.** MS spectra of furfuryl alcohol obtained from the reaction of furfural with (a) 2-propanol, (b) 2-propanol-OD, and (c) 2-propanol-d8 catalyzed by g-C<sub>3</sub>N<sub>4</sub>-10h/Zr(IV) at 120°C.

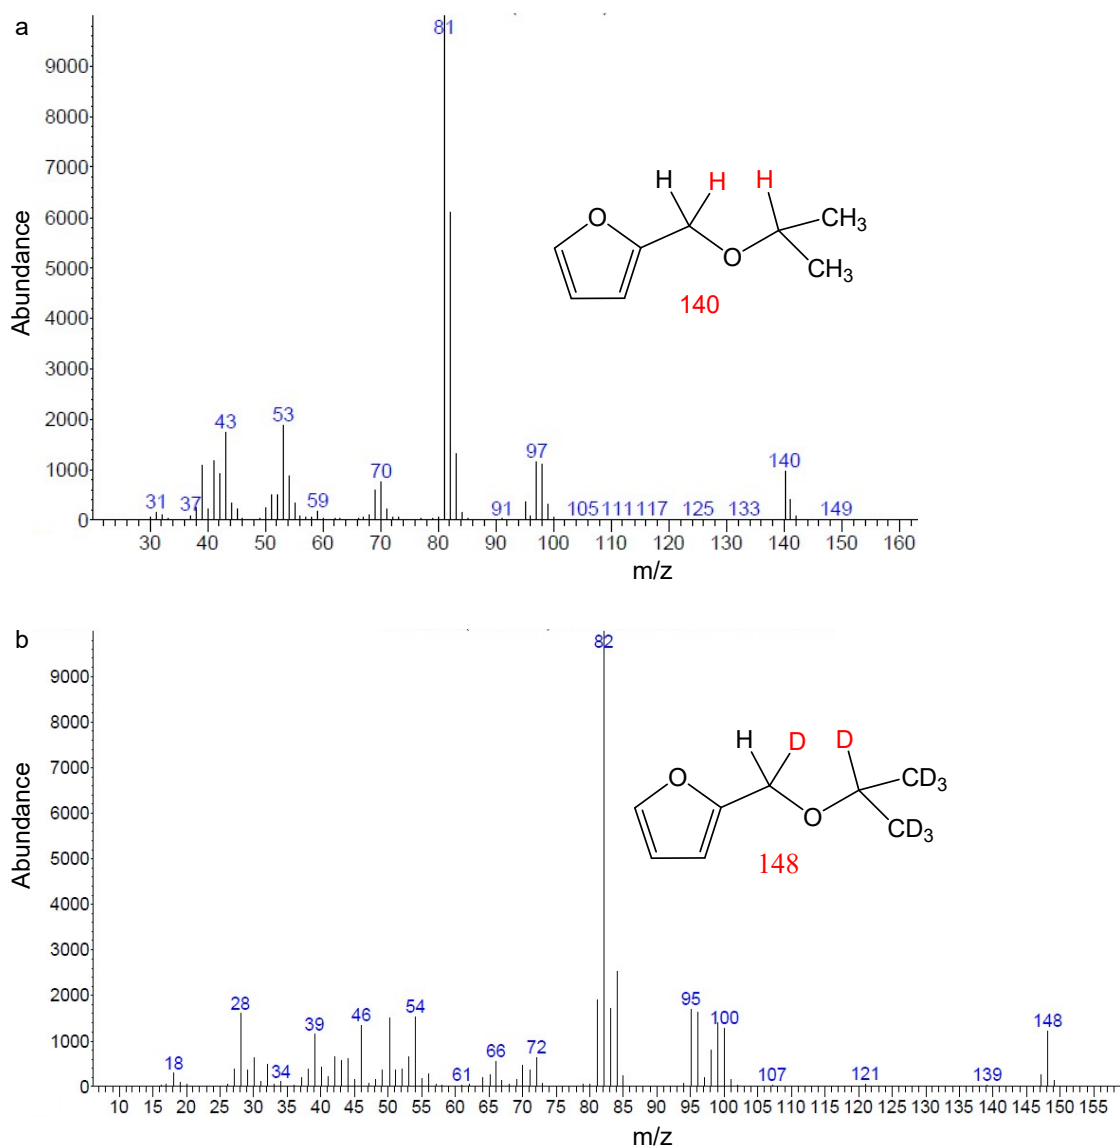

**Figure S9.** MS spectra of furfuryl isopropyl ether obtained from the reaction of furfural with (a) 2-propanol-OD and (b) 2-propanol-d8 catalyzed by g-C<sub>3</sub>N<sub>4</sub>-10h/Zr(IV) at 120°C.
